# Supplementary material for: Natronomonas salsuginis sp. nov., a New Inhabitant of a Marine Solar Saltern
Source: MDPI journal article supplement (doi:10.3390/microorganisms8040605), 2020-04-21
Supplement: s1 [file s1]

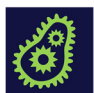

## *Natronomonas salsuginis* sp. nov., a New Inhabitant of a Marine Solar Saltern

Ana Durán-Viseras, Cristina Sánchez-Porro and Antonio Ventosa\*

Department of Microbiology and Parasitology, Faculty of Pharmacy, University of Sevilla, 41012 Sevilla, Spain; [anaduran@us.es](mailto:anaduran@us.es) (A.D.), [sanpor@us.es](mailto:sanpor@us.es) (C.S.-P.), [ventosa@us.es](mailto:ventosa@us.es) (A.V.)

\* Correspondence: [ventosa@us.es](mailto:ventosa@us.es); Tel.: +34-954556765

Received: date; Accepted: date; Published: date

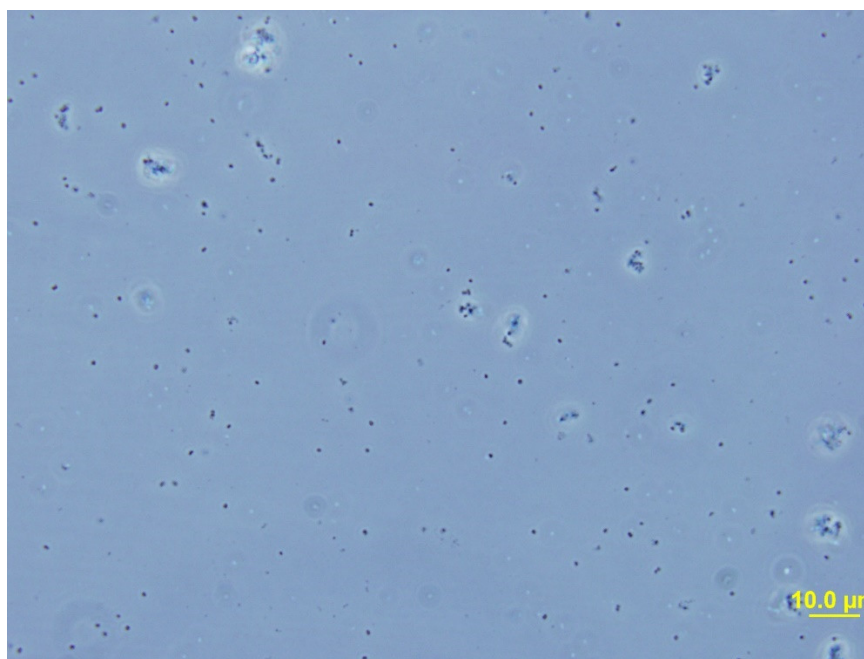

**Figure S1.** Phase-contrast photomicrograph of cells of strain F20-122<sup>T</sup> cultured in liquid medium under optimal conditions. Scale bar, 10 μm.

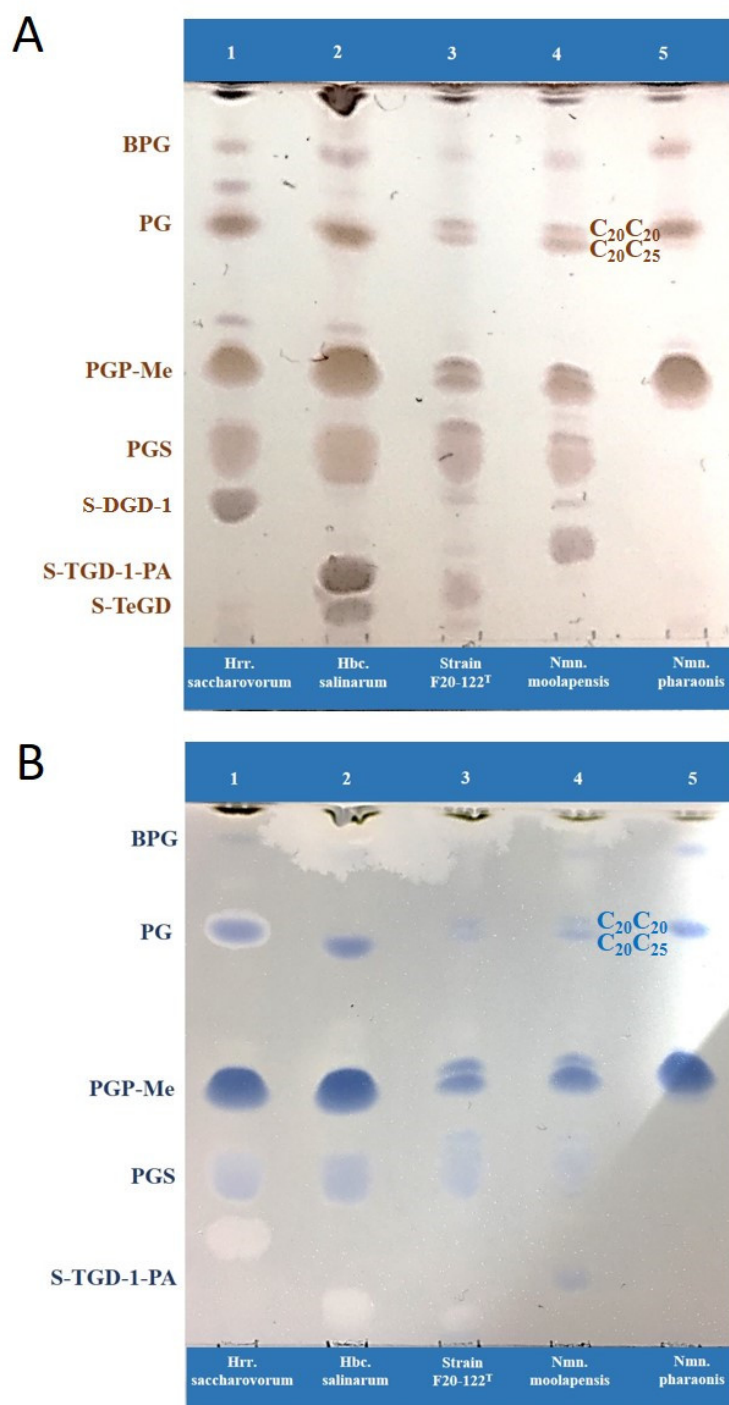

**Figure S2.** High performance thin layer chromatography (HPTLC) of polar lipids extracted from strain F20-122<sup>T</sup> and some other haloarchaeal species. A) The plate was revealed with sulfuric acid 5 % in water, followed charred by heating at 160 °C. B) The plate was revealed with molybdenum blue spray reagent. Lanes: 1, *Halorubrum saccharovorum* DSM 1137<sup>T</sup>; 2, *Halobacterium salinarum* DSM 3754<sup>T</sup>; 3, Strain F20-122<sup>T</sup>; 4, *Natronomonas moolapensis* CECT 7526<sup>T</sup>; 5, *Natronomonas pharaonis* CECT 4578<sup>T</sup>.

**Abbreviations:** BPG, biposphatidylglycerol; PG, phosphatidylglycerol; PGP-Me, phosphatidylglycerol phosphate methyl ester; PGS, phosphatidylglycerol sulfate; S-DGD-1, sulfated diglycosyl diether; S-TGD-1-PA, sulfated triglycosyl diphytanyl archaeol ester linked to phosphatidic acid; S-TeGD, sulfated tetraglycosyl diether.

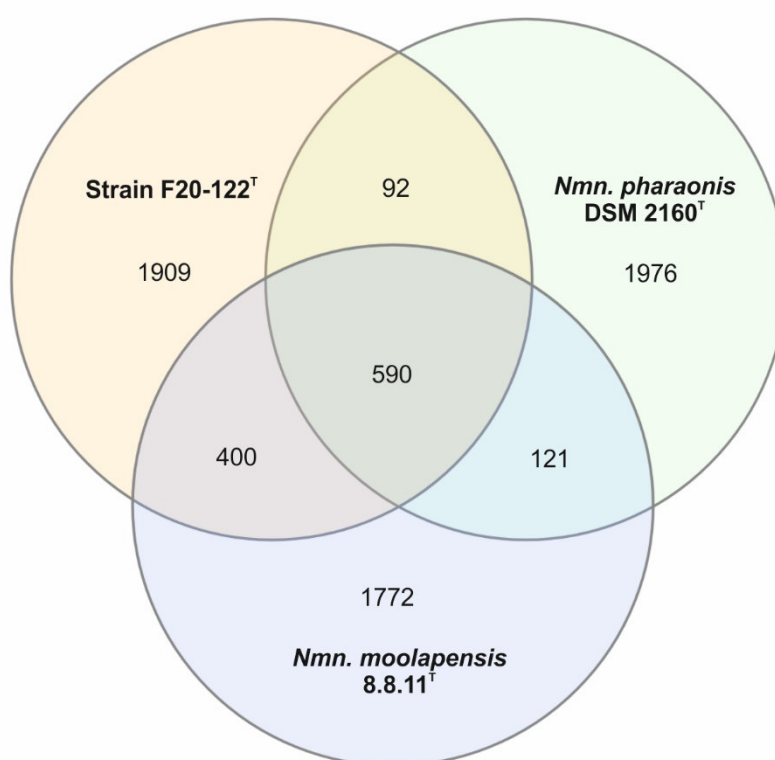

**Figure S3.** Venn diagram showing the number of genes shared between the genome of strain F20-122<sup>T</sup> and closest related species *Natronomonas pharaonis* DSM 2160<sup>T</sup> and *Natronomonas moolapensis* 8.8.11<sup>T</sup>. An all-versus-all BLAST search and 70 % nucleotide identity was used for comparisons of all predicted protein-coding genes annotated from each genome.

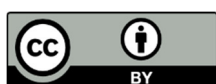

© 2020 by the authors. Submitted for possible open access publication under the terms and conditions of the Creative Commons Attribution (CC BY) license (<http://creativecommons.org/licenses/by/4.0/>).
